# Supplementary material
Source: Springer Nature journal article supplement (https://www.springermedizin.de/resource/supplementary/12877_2011_700_MOESM1_ESM.pdf/9440018)
Supplement: MOESM1 [file 9440018]

Population based screening by mail  
n=11807

Responders n (%)  
3767 (31.3)

AD participants recruited by GPs and included  
n=87

AD participants included after screening and examination  
n=100

Answered NO to all questions concerning cognitive impairment and YES to the question of participation  
n=791

Randomisation

Invited to participate in the control group  
n=500

Confirmed cognitively healthy and included in the control group  
n=200

All AD participants included in the study  
n=187
